# Supplementary material
Source: PubMed Central journal article supplement (PMC3298174)
Supplement: supp_78.6.1785_AEM7241-11_TableS1.pdf [file supp_78.6.1785_AEM7241-11_TableS1.pdf]

**Table S1. Genotypes and source of bacterial strains and plasmids.**

| Alias                                                 | Relevant genotype                                                                                                                 | Source            |
|-------------------------------------------------------|-----------------------------------------------------------------------------------------------------------------------------------|-------------------|
| <b><i>Escherichia coli</i></b>                        |                                                                                                                                   |                   |
| MC4100                                                | Wild-type K-12                                                                                                                    | C. Turnbough      |
| B171-8                                                | Wild-type EPEC                                                                                                                    | J. L. Puente      |
| EDL933                                                | Wild-type serotype O157:H7:K                                                                                                      | ATCC <sup>1</sup> |
| <b><i>Salmonella enterica</i> serovar Enteritidis</b> |                                                                                                                                   |                   |
| LK5                                                   | Wild-type phage type 8 prototroph                                                                                                 | D. M. Schifferli  |
| TK474                                                 | Wild-type prototroph strain                                                                                                       | F. C. Minion      |
| <b><i>Salmonella enterica</i> serovar Typhimurium</b> |                                                                                                                                   |                   |
| LT2                                                   | LT2 prototroph                                                                                                                    | S. Maloy          |
| MS1868                                                | <i>leuA414</i> (Am) <i>hsdL</i> (r-m+) ΔFels-2                                                                                    | M. Susskind       |
| MST3275                                               | 14028 ΔpSLT                                                                                                                       | D. Granger        |
| TR5877                                                | <i>hsdL6 hsdSA29 ilv-452 metA22 trpC2 metE551 xyl-404 fla-66 rpsL120</i> H1-b H2-e,n,x (Fels2)- (r-m+)LT (r-m+)S Str <sup>R</sup> | S. Maloy          |
| TH1731                                                | ΔGifsy-1 ΔGifsy-2 <i>galE496</i> -Tn10 <i>bio+1331</i>                                                                            | T. Ho             |
| TH1331                                                | <i>bio-104::Tn10d</i> (Tc) <i>galE496</i> ΔGifsy-1 ΔGifsy-2                                                                       | T. Ho             |
| MA 5973                                               | ΔGifsy-1                                                                                                                          | J. Slauch         |
| MA 5975                                               | ΔGifsy-1 ΔGifsy-2                                                                                                                 | J. Slauch         |
| MA 6275                                               | ΔGifsy-2                                                                                                                          | J. Slauch         |
| MST2883                                               | <i>ata::P22</i> . Stable P22 lysogen                                                                                              | S. Maloy          |
| <b>Other <i>Salmonella</i></b>                        |                                                                                                                                   |                   |
| SARB 1 - 72                                           | As described previously                                                                                                           | E. F. Boyd        |
| <b>Plasmids</b>                                       |                                                                                                                                   |                   |
| pKD46                                                 | pInts derivative, λ-Red recombinase helper plasmid with γ, β, and exo under <i>araC</i> - <i>Para</i> control                     | B. Wanner         |
| pKD3                                                  | pANTsy derivative <i>cat</i> flanked by FRT                                                                                       | B. Wanner         |
| pKD4                                                  | pANTsy derivative <i>kan</i> flanked by FRT                                                                                       | B. Wanner         |

<sup>1</sup>ATCC: American Type Culture Collection
